# Supplementary figures and images for: Viscoelasticity and elastocapillarity effects in the impact of drops on a repellent surface
Source: Royal Society of Chemistry journal article supplement (doi:10.1039/d1sm00438g), 2021-01-01

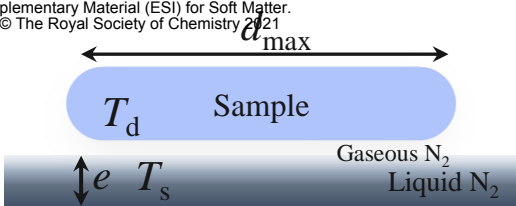

Supplement: d1sm00438g2.pdf [file d1sm00438g2.pdf]

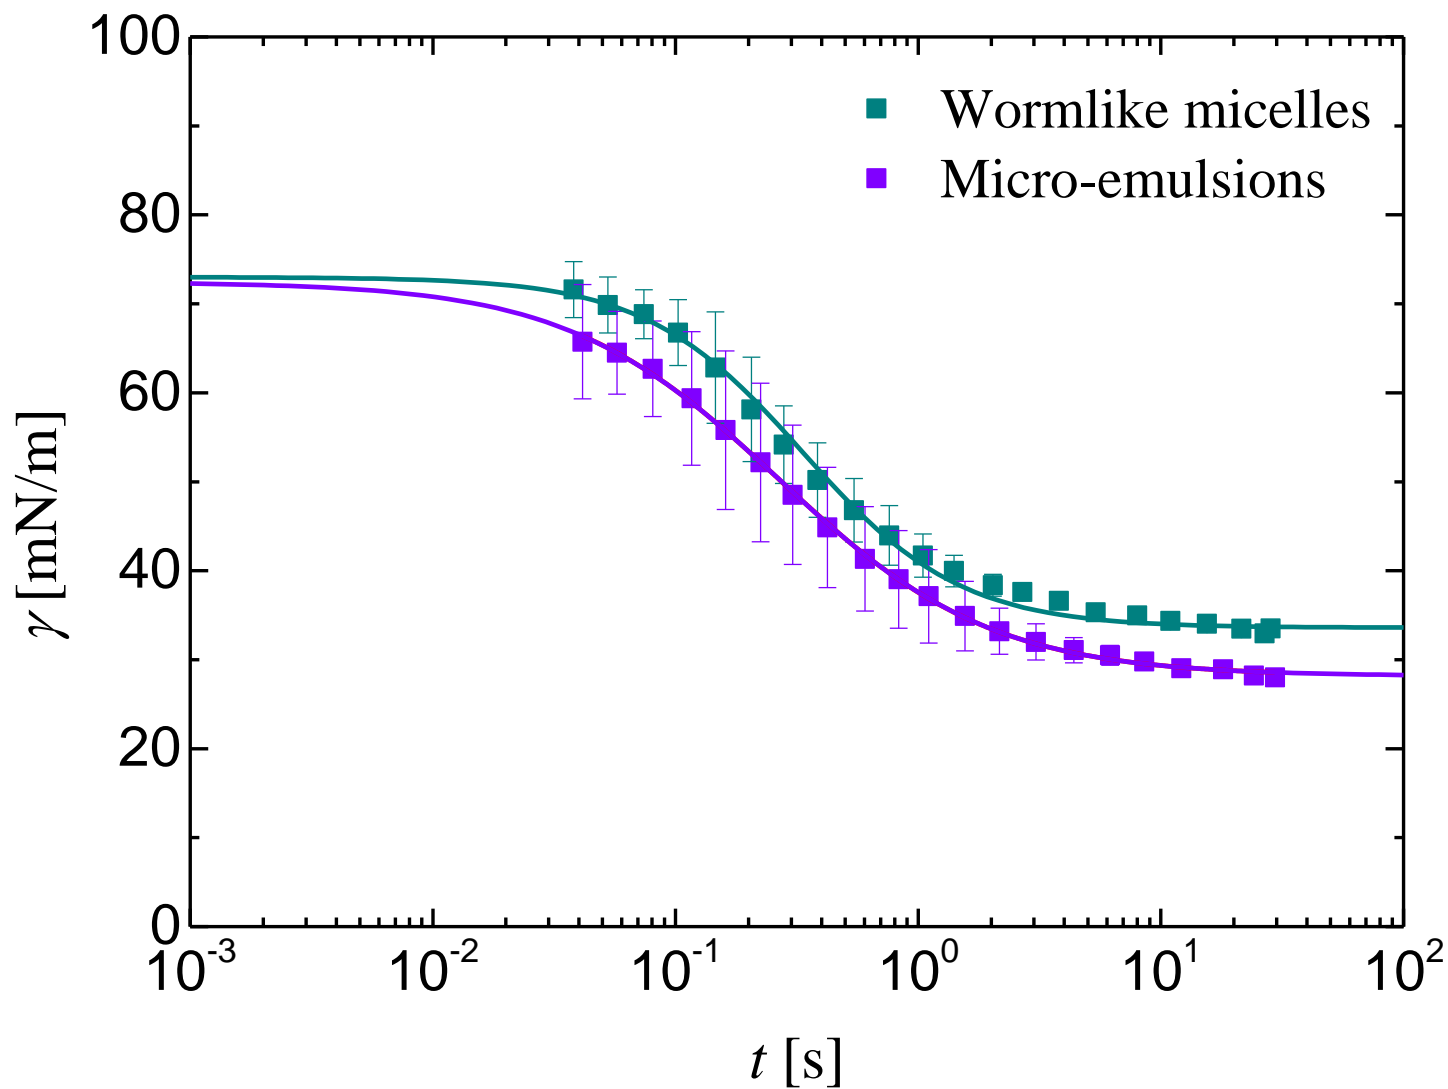

Supplement: d1sm00438g3.pdf [file d1sm00438g3.pdf]
